# Supplementary material for: Comparative Evaluation of the Antiglycation and Anti-α-Glucosidase Activities of Baicalein, Baicalin (Baicalein 7-O-Glucuronide) and the Antidiabetic Drug Metformin
Source: Pharmaceutics. 2022 Oct 9;14(10):2141. doi: 10.3390/pharmaceutics14102141 (PMC9612222; doi:10.3390/pharmaceutics14102141)
Supplement: Supplementary file 1 [file pharmaceutics-14-02141-s001.zip › pharmaceutics-1841170-supplementary.pdf]

# Supplementary Materials: Comparative Evaluation of the Anti-glycation and Anti-α-Glucosidase Activities of Baicalein, Baicalin (Baicalein 7-O-Glucuronide) and the Antidiabetic Drug Metformin

Guglielmina Froldi\*, Francine Medjiofack Djeuho, Nadia Bulf, Emma Caparelli and Eugenio Ragazzi

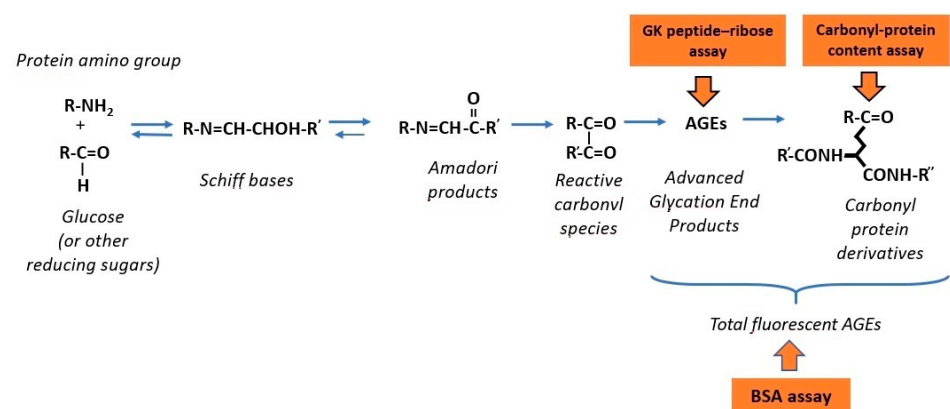

Figure S1. Scheme of AGE formation and protein carbonylation.

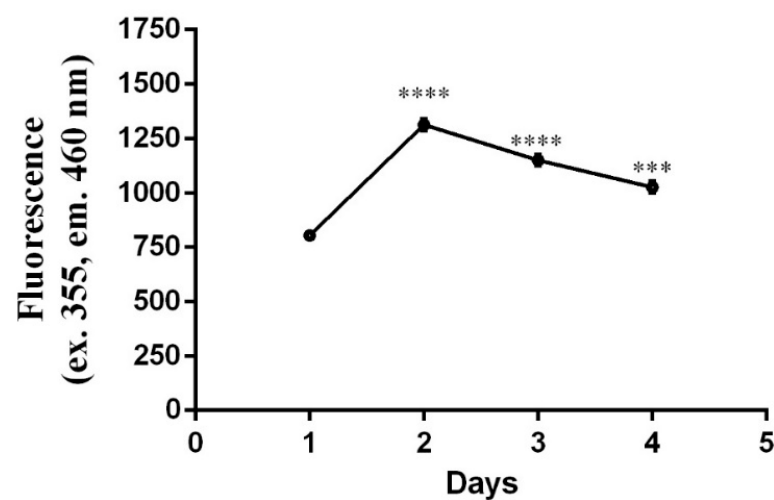

Figure S2. GK-peptide kinetic curve obtained by measuring the fluorescence intensity at 355 nm excitation and 460 nm emission wavelengths over several days of incubation with 0.1 M ribose. Data are reported as mean ± SEM of 3–6 experiments.

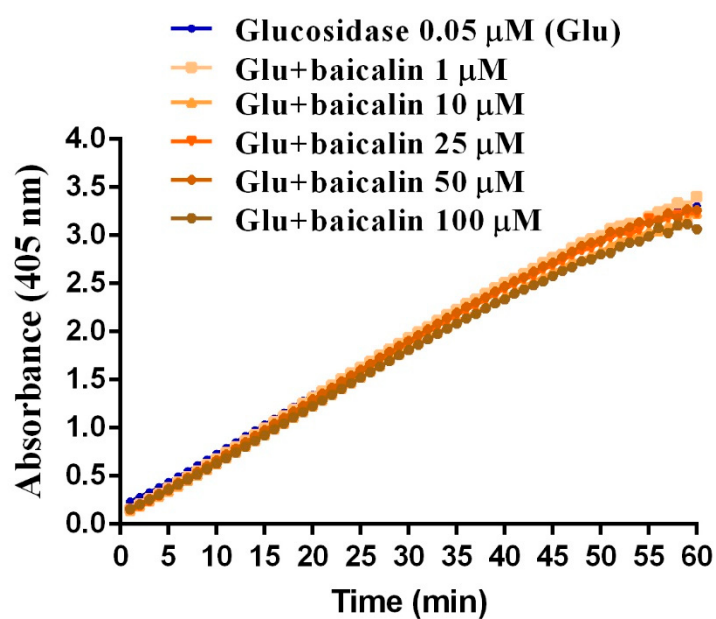

**Figure S3.** An example of kinetic curves of 0.05  $\mu\text{M}$   $\alpha$ -glucosidase and 2 mM *p*NPG in the presence of increasing concentrations of baicalin.

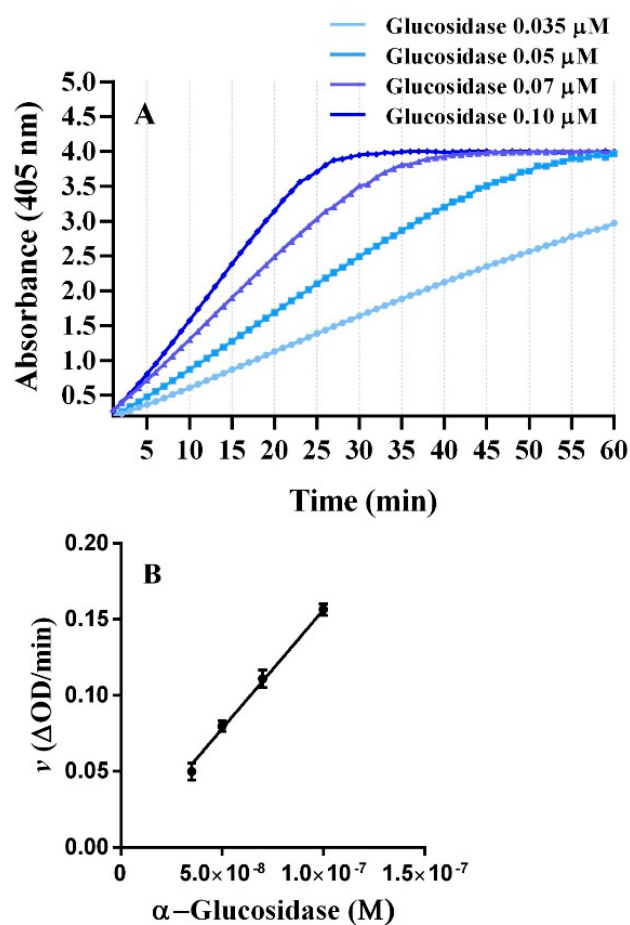

**Figure S4.** Enzyme kinetics observed with different concentrations of  $\alpha$ -glucosidase and 2 mM *p*NPG (A). Graph " $v$  versus [ $\alpha$ -glucosidase]" (B).

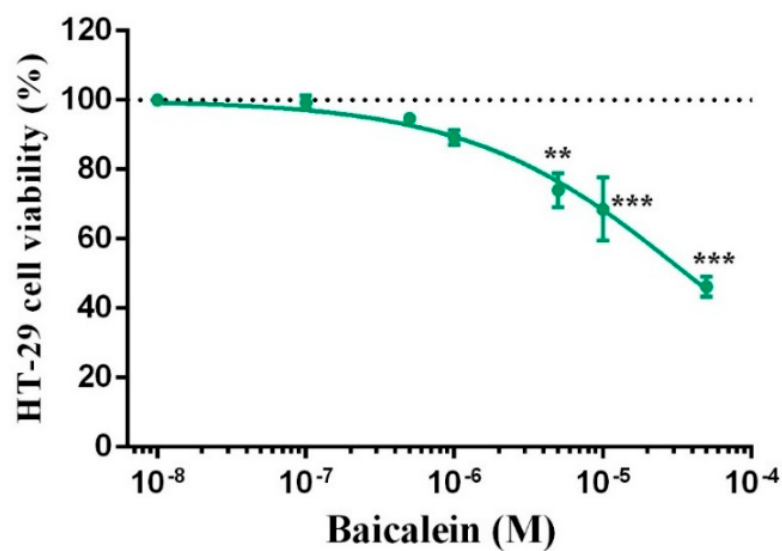

**Figure S5.** Effects of baicalein on the viability of human colon adenocarcinoma (HT-29) cells. \*\*  $p < 0.01$  and \*\*\*  $p < 0.0001$  vs control (cell viability without baicalein).
